# Supplementary material for: Photocatalytic hydrogen evolution on dye-sensitized mesoporous carbon nitride photocatalyst with magnesium phthalocyanine
Source: Royal Society of Chemistry journal article supplement (doi:10.1039/c0cp00611d), 2010-01-01
Supplement: c0cp00611d.pdf [file c0cp00611d.pdf]

*Supporting information*

Photocatalytic Hydrogen Evolution on  
Dye-Sensitized Mesoporous Carbon Nitride  
Photocatalyst with Magnesium Phthalocyanine

*Kazuhiro Takanabe,<sup>1</sup> Kumiko Kamata,<sup>1</sup> Xinchun Wang,<sup>2,3</sup> Markus Antonietti,<sup>2</sup>*

*Jun Kubota,<sup>1</sup> and Kazunari Domen<sup>†1</sup>*

<sup>1</sup> Department of Chemical System Engineering, The University of Tokyo,  
7-3-1 Hongo Bunkyo, Tokyo 113-8656, Japan.

<sup>2</sup> Colloid Chemistry, Max-Planck Institute of Colloids and Interfaces,  
14424 Potsdam, Germany.

<sup>3</sup> Research Institute of Photocatalysis, State Key Laboratory Breeding Base of  
Photocatalysis, Fuzhou University, Fuzhou 350002, China.

<sup>†</sup> Corresponding author

Tel: 81-3-5841-1148

Fax: 81-3-5841-8838

e-mail: [domen@chemsys.t.u-tokyo.ac.jp](mailto:domen@chemsys.t.u-tokyo.ac.jp)

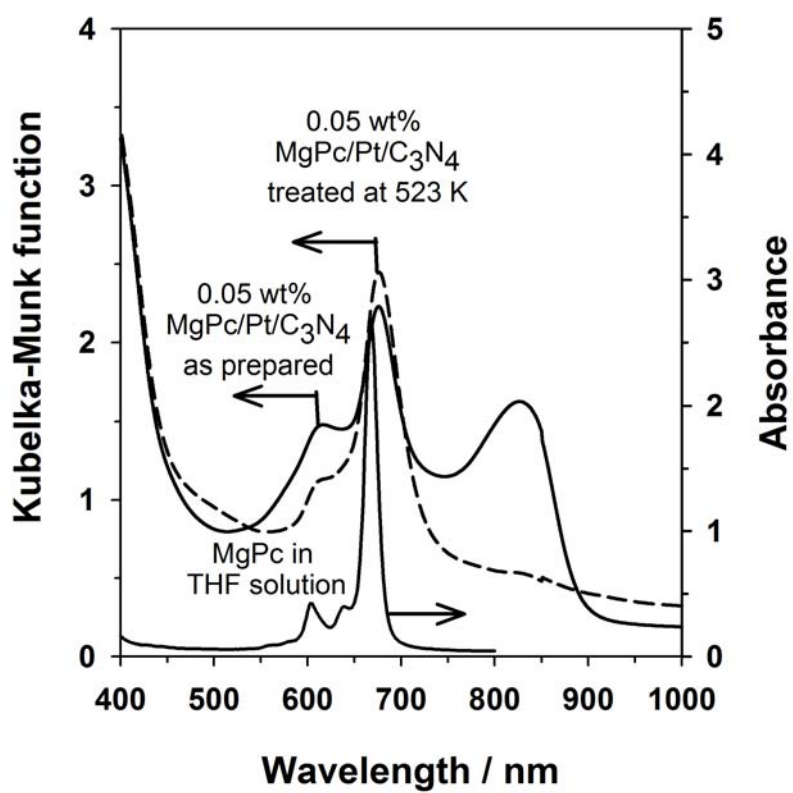

**Figure S1.** UV-VIS diffuse reflectance spectra for 0.05 wt% MgPc/Pt/mpg-C<sub>3</sub>N<sub>4</sub> and 0.05 wt% MgPc/Pt/C<sub>3</sub>N<sub>4</sub> treated at 523 K in static air, and UV-VIS absorption spectra for MgPc in THF solution.

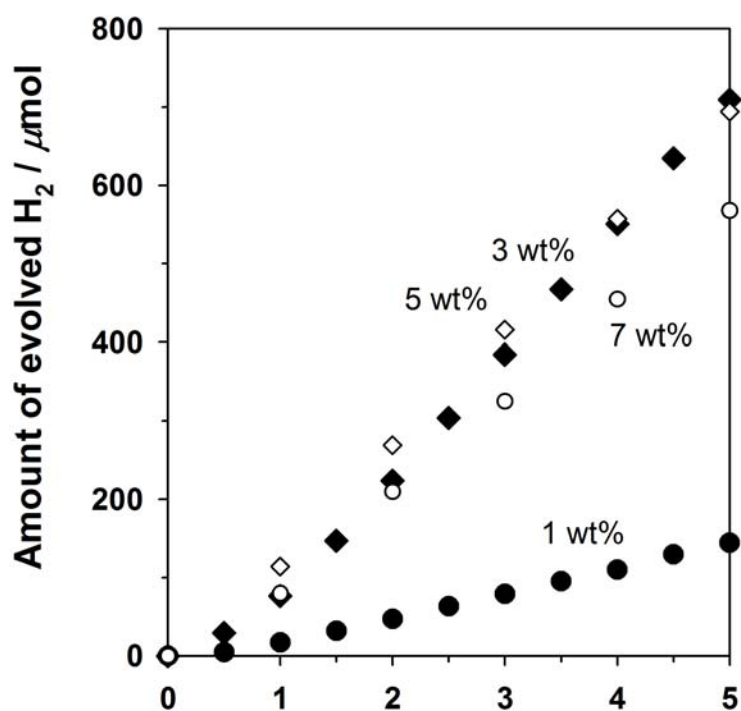

**Figure S2.** Amount of evolved H<sub>2</sub> gas using Pt/C<sub>3</sub>N<sub>4</sub> photocatalysts with different Pt loadings as a function of time (0.1 g cat.; 300 W Xe lamp; 10 vol% triethanolamine aqueous solution, 100 mL; Pyrex upper-irradiation vessel).

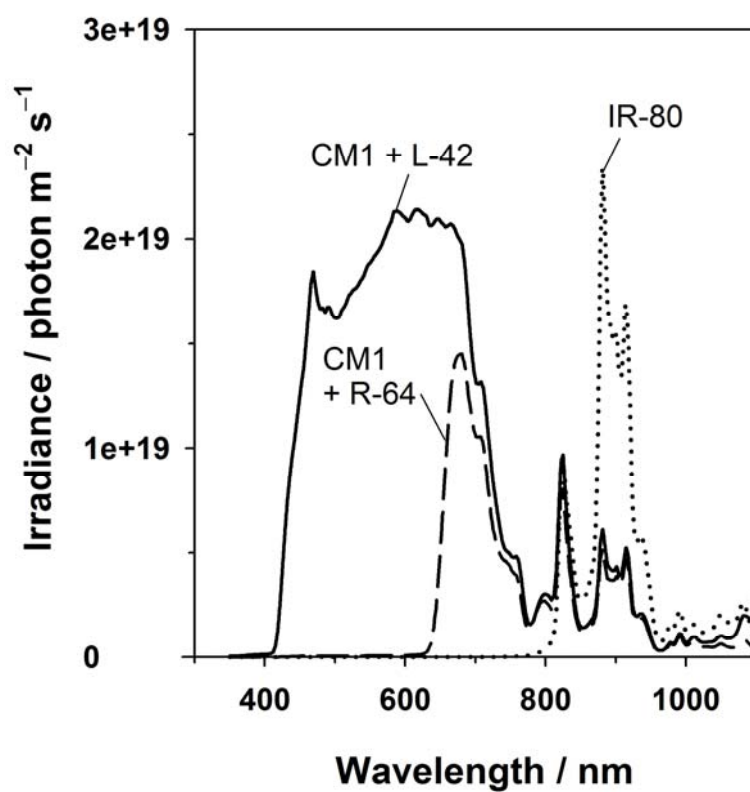

**Figure S3.** The number of photons as a function of wavelength for the irradiations using 300 W Xe lamp equipped with cutoff filters, CM1+L-42, CM1+R-64, and IR-80.

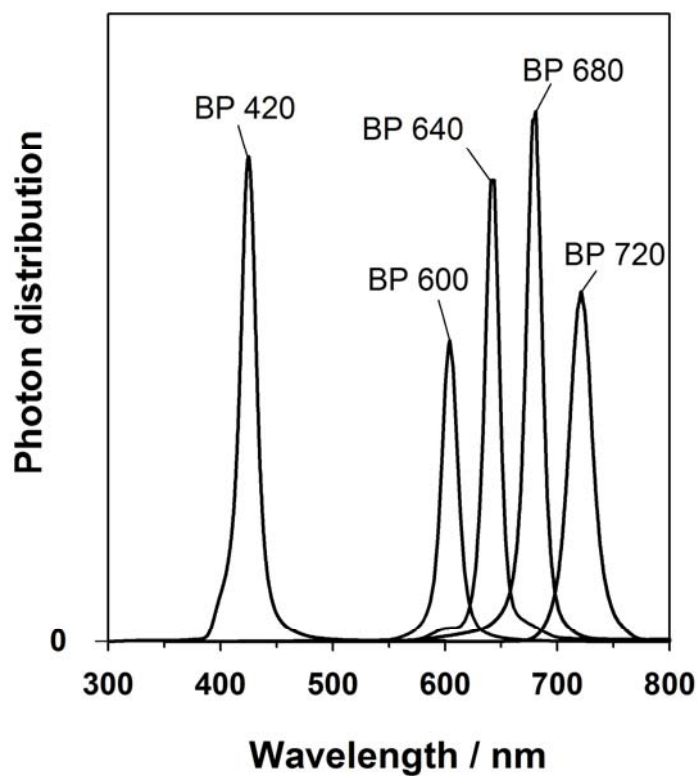

| Band pass filter | Photon number / $10^{18} \text{ s}^{-1}$ |
|------------------|------------------------------------------|
| BP420            | 6.5                                      |
| BP600            | 4.8                                      |
| BP640            | 3.4                                      |
| BP680            | 1.6                                      |
| BP720            | 1.5                                      |

**Figure S4.** Distribution of photons as a function of wavelengths (above) and the number of total photons (below) under irradiations by 300 W Xe lamp with band pass filters, BP420, BP 600, BP 640, BP680 and BP 720, respectively.
